# Supplementary material for: Global analysis of differentially expressed genes between two Japonica rice varieties induced by low temperature during the booting stage by RNA-Seq
Source: R Soc Open Sci. 2020 Jun 24;7(6):192243. doi: 10.1098/rsos.192243 (PMC7353964; doi:10.1098/rsos.192243)
Supplement: Table S1 [file rsos192243supp2.xlsx]

## Sheet: Sheet1
Table S1 Primers of ten DEGs for qRT-PCR validation
Gene ID	Forward Primer (5'-3')			Reverse Primer(5'-3')
Os05g0583000	GATGCCTCCTCTTCATCTCTAC			CACAAATTTATCTCGAGCAGCA
Os10g0580400	GCTCTTCACCTCCTTCCTG			GATCAGACCCGTCTTCACG
Os05g0322900	AGCATAGCATCATCTGTGTGTA			CGAAAAACGCACCGTATAGTAG
OsMAP1	CTAGTTCGGCACAAGTGGGT			TGTGCGTTCTGTGTTGCTTG
Os05g0537100	TAATAGTGTAGGTGTTCTGGGC			GCTACATCCAAAATGACCCATC
Os07g0154100	GCGACAAGCTTAGCTCAAATTA			GTGCATGACCGCTAAACTATTT
OsTrx23	CGCAGGCGCAAGTTATCAAA			TATTCGAGGACACCCAAGCC
OsCATC	CTTCTCCTACTCCGACACGC			AAGCCGTCGTAGTGGTTGTT
OsAPX2	CTTGTGAGTGGCGAGAAGGA			AAAGAAGGCGTCCTCATCCG
Os09g0111100	AACAAGCGGTGGTAGGATCG			CTACAGCAGCCACGTCTAGT
ACTIN1	CCTTCAACACCCCTGCTATG			CAATGCCAGGGAACATAGTG
